# Supplementary material for: Nicotine exacerbates atherosclerosis and plaque instability via NLRP3 inflammasome activation in vascular smooth muscle cells
Source: Theranostics. 2023 May 8;13(9):2825–42. doi: 10.7150/thno.81388 (PMC10240824; doi:10.7150/thno.81388)
Supplement: Supplementary file 1 — Supplementary figures and table. [file thnov13p2825s1.pdf]

## SUPPLEMENTAL MATERIAL

### Nicotine exacerbates atherosclerosis and plaque instability via NLRP3 inflammasome activation in vascular smooth muscle cells

Junqing An<sup>#</sup>, Liu Ouyang<sup>#</sup>, Changjiang Yu, Sean Michael Carr, Tharmarajan Ramprasath, Zhixue Liu, Ping Song, Ming-Hui Zou, Ye Ding<sup>\*</sup>

Center for Molecular and Translational Medicine, Georgia State University, 157 Decatur Street SE, Atlanta, GA 30303

#### Supplemental Figures

##### Supplemental Figure 1

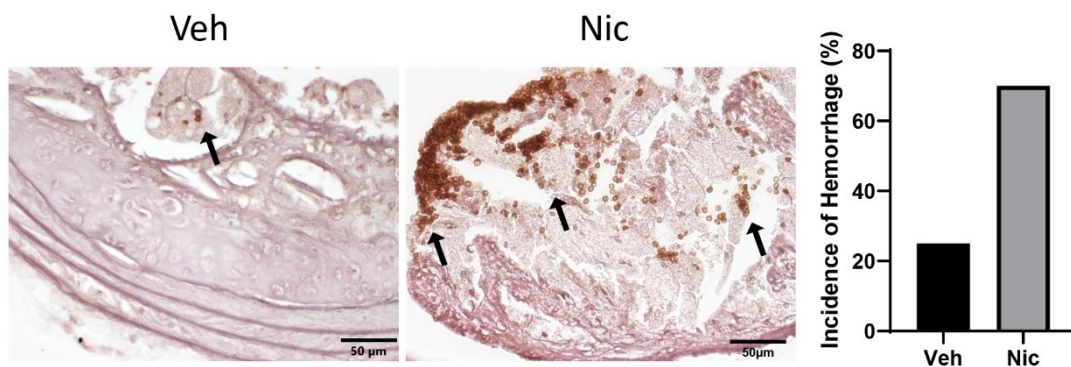

**Figure S1. Red blood cells in atherosclerotic plaques.** Representative immunohistochemistry staining of Ter119 for red blood cells and quantification of hemorrhage incidence in BA of *Apoe*<sup>-/-</sup> mice with vehicle or nicotine infusion. Scale bar: 50 µm. Veh, vehicle; Nic, nicotine.

## Supplemental Figure 2

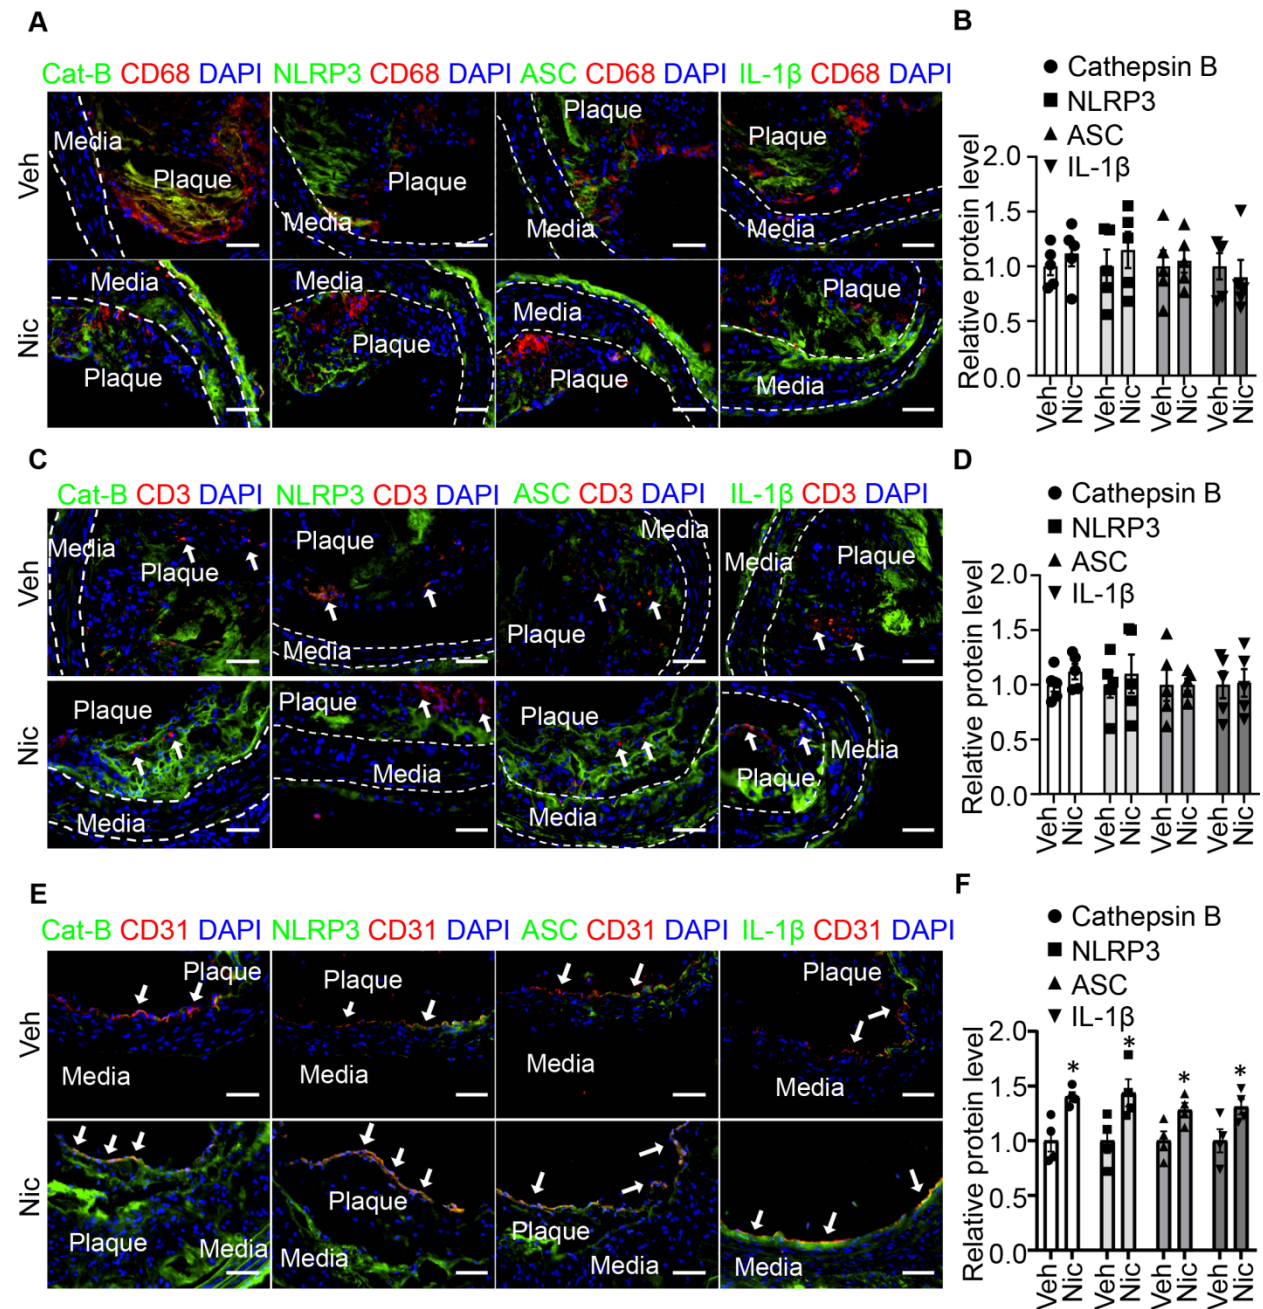

**Figure S2. The effect of nicotine on inflammasome activation in macrophages, T cells and endothelial cells.** (A-B), Immunofluorescence staining and quantification of CD68 and Cat-B, NLRP3, ASC, or IL-1 $\beta$  in BA of *Apoe*<sup>-/-</sup> mice with vehicle or nicotine infusion. N=5. Scale bar: 50  $\mu$ m. (C&D), Immunofluorescence staining and quantification of CD3 and Cat-B, NLRP3, ASC, or IL-1 $\beta$  in BA of *Apoe*<sup>-/-</sup> mice with vehicle or nicotine infusion. N=5. Scale bar: 50  $\mu$ m. (E-F),

Immunofluorescence staining and quantification of CD31 and Cat-B, NLRP3, ASC, or IL-1 $\beta$  in BA of *Apoe*<sup>-/-</sup> mice with vehicle or nicotine infusion. N=4. Scale bar: 50  $\mu$ m. Cat B: Cathepsin B. Veh, vehicle; Nic, nicotine. Values represent the mean  $\pm$  SEM. \**P*<0.05 vs Veh.

### Supplemental Figure 3

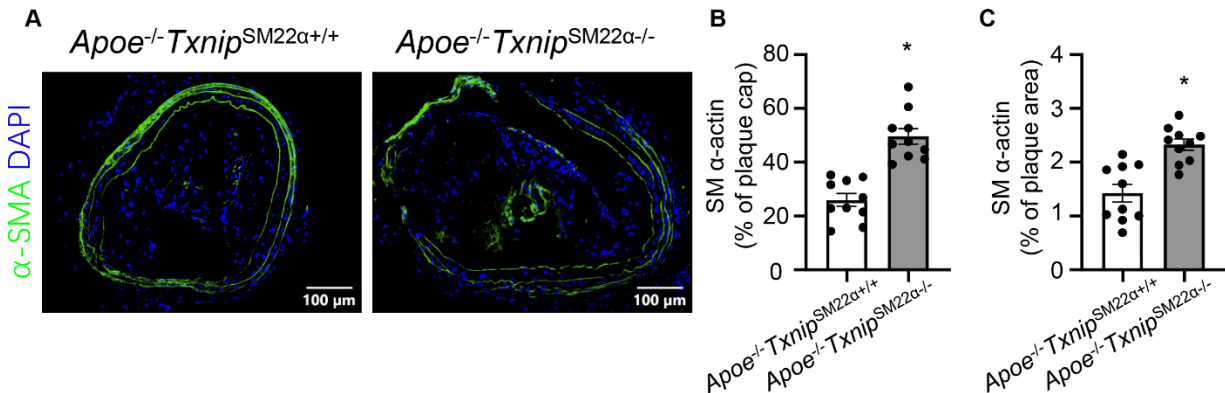

**Figure S3. TXNIP deletion in smooth muscle cells improves  $\alpha$ -SMA expression in nicotine-induced atherosclerosis and plaque vulnerability.** (A) Representative images of immunofluorescence staining of  $\alpha$ -SMA (SM  $\alpha$ -actin) in BA of *Apoe*<sup>-/-</sup>*Txnip*<sup>SM22α+/+</sup> and *Apoe*<sup>-/-</sup>*Txnip*<sup>SM22α-/-</sup> mice infused with nicotine. (B) Quantification of plaque SM  $\alpha$ -actin coverage on the plaque cap in BA of *Apoe*<sup>-/-</sup>*Txnip*<sup>SM22α+/+</sup> and *Apoe*<sup>-/-</sup>*Txnip*<sup>SM22α-/-</sup> mice infused with nicotine. (C) Quantification of total plaque SM  $\alpha$ -actin content in BA of *Apoe*<sup>-/-</sup>*Txnip*<sup>SM22α+/+</sup> and *Apoe*<sup>-/-</sup>*Txnip*<sup>SM22α-/-</sup> mice infused with nicotine. N=10. Scale bar: 100  $\mu$ m. Values represent the mean  $\pm$  SEM. \**P*<0.05 vs *Apoe*<sup>-/-</sup>*Txnip*<sup>SM22α+/+</sup>. Veh, vehicle; Nic, nicotine.

## Supplemental Figure 4

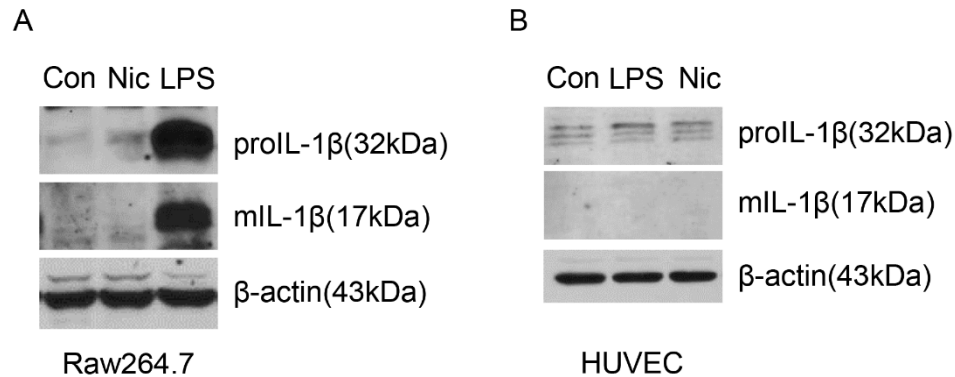

**Figure S4. Nicotine did not increase inflammatory cytokine IL-1β in macrophage and HUVEC.** (A-B) Western blot analysis of IL-1β in nicotine (0.5 μM) treated macrophage Raw264.7 (A) and HUVECs (B) for 24 hours. 100 ng/mL LPS served as control. Nic, nicotine.

## Supplemental Figure 5

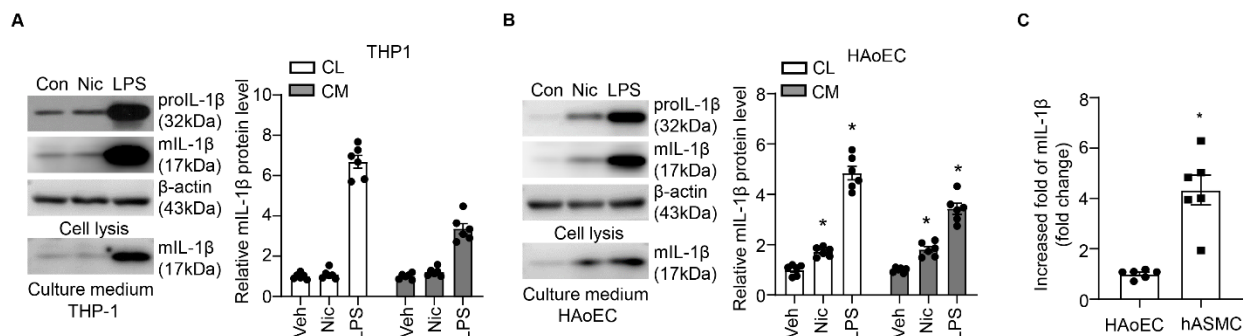

**Figure S5. The effects of nicotine on inflammatory cytokine IL-1β in THP-1 and HAEC.** (A) Western blot analysis and quantification of IL-1β release in nicotine (0.5 μM for 24 h) treated THP-1 cells. N=3. (B) Western blot analysis and quantification of IL-1β release in nicotine (0.5 μM for 24 h) treated human aortic endothelial cells (HAoECs). N=6. (C) Relative increased fold of mL-1β in HAoECs and VSMCs. N=6. 100 ng/mL LPS for 24 hours served as control. Values represent the mean ± SEM. \**P*<0.05 vs Veh. Veh, vehicle; Nic, nicotine.

## Supplemental Figure 6

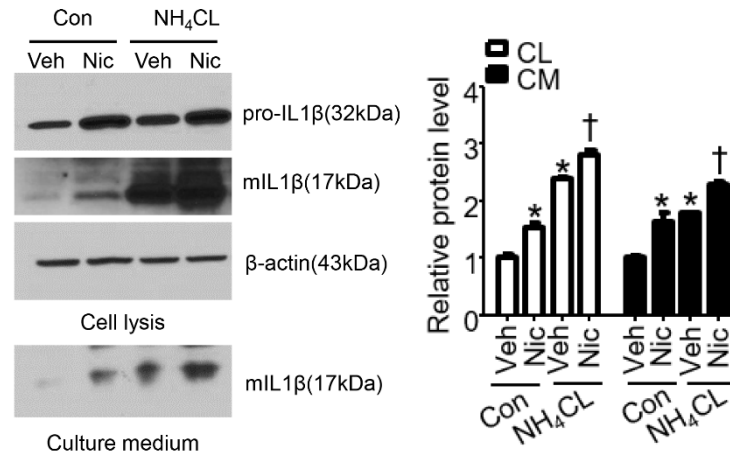

**Figure S6. Lysosomal acidification inhibitor NH<sub>4</sub>Cl further increased mIL-1 $\beta$  secretion both in cell lysis and cell culture medium induced by nicotine.** VSMCs were treated with nicotine (0.5  $\mu$ M for 24 h) together with or without NH<sub>4</sub>Cl (20 mM for 24 h). Western blot analysis of IL-1 $\beta$ . Values represent the mean  $\pm$  SEM. \* $P$ <0.05 vs. Veh-Con. † $P$ <0.05 vs Nic-Con. Veh, vehicle; Nic, nicotine.

## Supplemental Table 1. Primer sequences used in real-time quantitative PCR.

| Sequence no. | Gene name          | Primer sequence                                              |
|--------------|--------------------|--------------------------------------------------------------|
| 1.           | Human 18S          | F-5'-GTAACCCGTTGAACCCCAT-3'<br>R-5'-CCATCCAATCGGTAGTAGCG-3'  |
| 2.           | Human NLRP3        | F-5'-CTTCTCTGATGAGGCCCAAG-3'<br>R-5'-GCAGCAAAGTGGAAAGGAAG-3' |
| 3.           | Human ASC          | F-5'-CTCTGTACGGGAAGGTCCTG-3'<br>R-5'-TCCTCCACCAGGTAGGACTG-3' |
| 4.           | Human Caspase1     | F-5'-TTCTGCTCTTCCACACC-3'<br>R-5'-CTACCATCTGGCTGCTC-3'       |
| 5.           | Human IL-1 $\beta$ | F-5'-AAGGGCTGCTTCCAAACCT-3'<br>R-5'-ATACTGCCTGCCTGAAGCT-3'   |
